# Supplementary material
Source: publisher figshare collection journal article supplement (https://sage.figshare.com/ndownloader/files/12710381)
Supplement: Supplementary file 1 [file 12710381]

**Supplementary material**

| **Inter-rater agreement of extrinsic video assessment** | | | | | | |
| --- | --- | --- | --- | --- | --- | --- |
| **Score difference** | **Mode A** | **%** | **Mode B** | **%** | **Mode C** | **%** |
| None | 153 | 76.5 | 152 | 76 | 148 | 74 |
| 1 | 44 | 22 | 42 | 21 | 46 | 23 |
| 2 | 2 | 1 | 5 | 2.5 | 6 | 3 |
| 3 | 1 | 0.5 | 1 | 0.5 | - | - |

**Supplementary Table 3** Inter-rater agreement for extrinsic video assessment with three examination modes. Calculations are based on 200 cat eyes resulting from 50 evaluated cats per examiner.
